# Supplementary material for: Does intestinal epithelial integrity status in response to high-protein dairy milk beverage with or without progressive resistance training impact systemic inflammatory responses in an active aging population?
Source: PLoS One. 2022 Sep 2;17(9):e0274210. doi: 10.1371/journal.pone.0274210 (PMC9439207; doi:10.1371/journal.pone.0274210)
Supplement: S1 Data — (XLSX) [file pone.0274210.s001.xlsx]

## Sheet: All data
		GROUP	Sex 1= M, 2=F	Age	Height	weight	Exercise	BF	H2	BMI	CRP B	CRB 6	CRB 12	IL1RA B	IL1RA 6	IL1RA 12	SCD14 B	SCD14 6	SCD14 12	LPB B	LPB 6	LPB 12	IL1B B	IL1B 6	IL1B 12
	RB	EX	1	58	1.77	91.3	300	24.6	3.1329	29.1423	0.9	0.39	1.08	0	0	0	1.51	1.32	2.57	7.29	6.47	7.79	0.83	0.75	1.3
	FS	EX	2	51	1.77	58	300	24.8	3.1329	18.5132	0.19	0.46	0.01	0	0	0.2	1.84	2.21494	3.53328	0	10.555	13.5524	0.02	0	0
	GT	EX	1	60	1.82	92.4	360	25.8	3.3124	27.8952	0.03	0.03	0	0	0	0.25	1.69	2.46544	1.79483	9.29	13.9018	9.52856	0.01	0	0.009397
	JB	EX	1	63.2	1.69	83	300	32.4	2.8561	29.0606	2.48	1.56	13.94	0	0	0	1.11	1.48382	1.65195	7.59	7.59484	8.3229	0	0	0
	IF	EX	1	62.1	1.66	51.2	300	12.7	2.7556	18.5803	0.01	0.04	0	0	0	0	1.69	1.60062	1.60961	8.61	8.23756	7.97488	0	0	0
	KH	EX	1	68.2	1.76	72.5	200	29.3	3.0976	23.4052	0.99	1.03	1	4.87	0	23.1582	0.76	2.69612	2.2214	22.41	17.2144	15.2686	2.51	1.79741	0
	LB	EX	1	60	1.97	107.1	210	31.1	3.8809	27.5967	0.99	8.06	1	0	0	0	2.28	1.93724	1.20144	2.98	1.23372	0.755742	0.04	0.40784	0.077512
	AL (106)	EX	1	50.5	1.71	60.25	240	17.2	2.9241	20.6046	1	0.99	0.99	0.02	0.010195	0.05226	0.93	1.84597	1.19769	1.24	0.922986	0.76916	0	0.009819	0.010988
	DG	DM	1	60	1.85	82.1	270	19.4	3.4225	23.9883	0.29	0.3	0.11	0	0	0	3.04	2.32686	2.45298	4.27	7.40365	9.19869	0	0	0.020788
	EC	DM	1	68	1.68	68	150	31.1	2.8224	24.093	0.98	0.02	0.16	0	0	0	2.23	3.07709	2.23512	8.85	8.34895	10.021	0	0.165435	0.021186
	RM	DM	1	71	1.78	71.7	190	19.4	3.1684	22.6297	0.99	1.14	1	4.77	0.772906	16.5734	1.96	2.2534	2.64647	8.02	11.7351	14.3341	0.02	0	2.21538
	JB	DM	1	66	1.9	78.8	100	20.7	3.61	21.8283	0.99	1	1.02	0.03	0.008828	0.009759	3.43	3.09863	3.4742	0.75	1.11233	2.52758	0.09	0.026484	0.019518
	SH	DM	1	53	1.82	92.6	90	28.7	3.3124	27.9556	0.93	1	7.46	0.04	0.03132	0.051985	2.25	1.68084	1.40359	1.1	1.827	1.08129	0	0.03	0.010397
	SD	DM	1	50	1.88	95.1	240	30.1	3.5344	26.907	2.78	1	1.28	0.01	0.255164	0.16235	0.84	1.68084	2.00662	1.68	1.65996	1.48677	0.27	0	0.38
	MG	DM	2	50	1.53	49.2	375	22.9	2.3409	21.0176	0.59	0.8	0.99	0	0	0	2.41	2.7189	2.43639	0.82	1.007	1.00001	0.02	0.01	0
	JW	EX+DM	2	71	1.66	61.6	90	47	2.7556	22.3545	3.2	1.55	1.45	0	0	0	2.08	2.4998	3.90832	9.52	17.2831	10.0529	0.02	0.02	0.01
	TS	EX+DM	2	62	1.65	77.5	270	42.8	2.7225	28.4665	0.99	0.45	1	0	0	0	3.38	2.85267	2.78888	25.43	42.3294	35.056	0.02	0	0
	PC	EX+DM	1	73	1.65	74	112.5	29.4	2.7225	27.1809	0.42	0.29	0.73	6.98	32.957	21.7064	1.87	1.96232	1.87428	7.34	9.13235	6.00556	0	1.16	0.74
	DR	EX+DM	1	58	1.66	66.65	90	17.3	2.7556	24.1871	0.9	14.92	1	0	0	0	2.27	2.56043	3.99649	15.97	18.3095	4.08857	0.04	0	0.02
	AL (65)	EX+DM	1	50	1.78	69.8	270	18.8	3.1684	22.03	0.83	0.99	1	0	0	0	2.36	2.64684	0.58904	0.67	0.514024	0.20128	0.04	0.01	0.02
	SF	EX+DM	2	66	1.77	68.95	210	47.8	3.1329	22.0084	1.34	1.4	0.78	0	0.035904	0	1.99	1.58875	1.6268	1.75	1.72339	2.44485	0.02	0.02	0.03
	MT	EX+DM	1	62	1.77	80.25	350	23.5	3.1329	25.6152	0.99	0.095	0.19	0.04	47.9711	85.3571	2.35	1.94198	0.080016	0.96	0.785421	0.920184	7.58	10.66	9.77
	EM	EX+DM	2	56.8	1.67	53.55	90	17.5	2.7889	19.2011	1	0.09	1	0	0.03	0.64	1.74	1.49	0.6	8.26	7.82	9.73	0.02	0.01	0.01
	PT	CON	1	71	1.66	61.6	90	16.7	2.7556	22.3545	0.89	0.81	0.32	0	0	0.009627	1.52	2.24299	1.54032	9.61	13.3506	6.54636	0.85	1.15906	0.818295
	LL	CON	2	62	1.65	77.5	270	36.9	2.7225	28.4665	0.95	0.87	0.09	0	0	0	2.84	3.19151	1.17027	8.22	9.31672	8.00214	0.07	0.03556	0
	PH	CON	1	73	1.65	74	112.5	18.7	2.7225	27.1809	0.42	0.28	0.73	3.85	4.4381	0	0.8	1.56892	1.74466	9.08	11.8206	10.3387	0.03	0.10746	0.147696
	SG	CON	1	74	1.74	92.05	225	19.7	3.0276	30.4036	1	1	0.63	0.01	0.00985	0	2.86	1.92075	1.60791	0.92	0.8274	0.648807	0.02	0	0.009403
	IP	CON	1	58	1.66	66.65	90	11.3	2.7556	24.1871	0.8	0.74	1.02	56.34	0	0.032733	1.76	1.40919	2.6732	1.23	1.03193	0.87288	9.77	0.022192	0.043644
	CR	CON	1	66	1.77	68.95	210	36.8	3.1329	22.0084	1	0.93	0.8	0.04	0.01113	0.064001	0.74	1.82532	1.02402	0.87	1.14639	0.722297	0.02	0.02226	0
	SP	CON	1	54	1.56	89.95	150	18.2	2.4336	36.9617	0.9	0.74	1.03	0.07	0.02226	0	1.99	1.95888	1.73717	1.07	1.14639	0.713154	0.7	0.15582	0.018286
	TH	CON	1	62	1.77	80.25	350	24.9	3.1329	25.6152	1	0.96	0.86	0.03	0.10538	0.151151	0.02	1.36994	1.88357	0	0	0	0.02	0.01916	0.011627
	JS	CON	2	68.4	1.55	58.05	150	29.6	2.4025	24.1623	1	1.04	0	0.01	0.1	0.06	0.12	2.03	0.75	0.7	0.71	0.66	0.01	0	0.01
			MEAN	61.8188	1.72531	74.2047	211.094	25.8469	2.98652	24.8625	0.992812	1.40547	1.33344	2.40969	2.71122	4.63997	1.83313	2.10816	1.93845	5.82812	7.38973	6.26923	0.72	0.518703	0.491379
			SD	7.31029	0.0990576	13.87	91.2627	9.06901	0.34442	3.88116	0.669754	2.7745	2.58434	9.83998	9.95702	15.692	0.836904	0.534472	0.932241	6.19733	8.43664	6.95208	2.12587	1.86868	1.72952
